# Supplementary material for: Pressure-enhanced dehydrogenation reaction of the LiBH4–YH3 composite
Source: Royal Society of Chemistry journal article supplement (doi:10.1039/c1cc14072h), 2011-01-01
Supplement: c1cc14072h.pdf [file c1cc14072h.pdf]

## Experimental procedure:

LiBH<sub>4</sub> with 95 % purity was purchased from Acros. YH<sub>3</sub> was synthesized by the hydrogenation of yttrium (Acros, 99.9%, -40 mesh powder) at 350 °C and 9.0 MPa of hydrogen (99.9999 %) for 2 hours. The XRD pattern of the synthesized YH<sub>3</sub> powder shows that YH<sub>3</sub> is present as a main product together with a small amount of YH<sub>2</sub> and Y<sub>2</sub>O<sub>3</sub> phase (Fig. S1). The yttrium oxide was formed due to the impurities of LiBH<sub>4</sub>. 3 g of 4LiBH<sub>4</sub> + YH<sub>3</sub> composite was prepared using a planetary ball mill (Retsch PM200), sealed with a lid having a Viton O-ring at 650 rpm for 12 hours. Thirteen 12.7 mm diameter and twenty four 7.9 mm diameter Cr-steel balls were employed together with a 140 ml hardened steel bowl. The ball-to-powder weight ratio was 50:1. The whole process of sample mixing and loading was carried out inside an argon-filled glovebox (mBraun, UniLab), where oxygen and water vapor levels were kept below 1 ppm.

The dehydrogenation of the 4LiBH<sub>4</sub> + YH<sub>3</sub> composite under either hydrogen (99.9999 %) or argon (99.9999 %) back pressure was carried out using a Sievert-type volumetric apparatus. 0.3 g of the composite in a 110 ml reactor was dehydrogenated at 350 °C for 20 hours (heating rate = 30 °C/min), monitoring the pressure in the reactor.

High pressure differential scanning calorimetry (HP-DSC) measurements of the composite were performed in a Netzsch DSC 204 HP at 0.3, 0.4 and 0.5 MPa of 99.9999% hydrogen. 2 mg of the composite sample in an aluminum crucible was loaded into a chamber together with an empty reference aluminum crucible. The crucible was heated to 400 °C with a rate of 40 °C/min and then maintained at 400 °C for 200 minutes.

XRD measurements of the ball milled and dehydrogenated samples were performed using a Bruker D8 Advance X-ray diffractometer with Cu K $\alpha$  radiation. In order to prevent air exposure of the samples, borosilicate capillary tubes were used during the measurements.

Raman spectroscopy was performed at room temperature using a Horiba Jobin-Yvon LabRam ARAMIS with a 514 nm Ar-ion laser. The samples were prepared by using a Sievert-type apparatus as described above. 0.3 g of the composite was dehydrogenated at 400 °C for an hour (heating rate = 30 °C/min) under static vacuum and various hydrogen and argon back pressures. Subsequently, the samples were cooled down to room temperature within a few minutes. During the measurements, the samples were inevitably exposed to air.

## Supporting results:

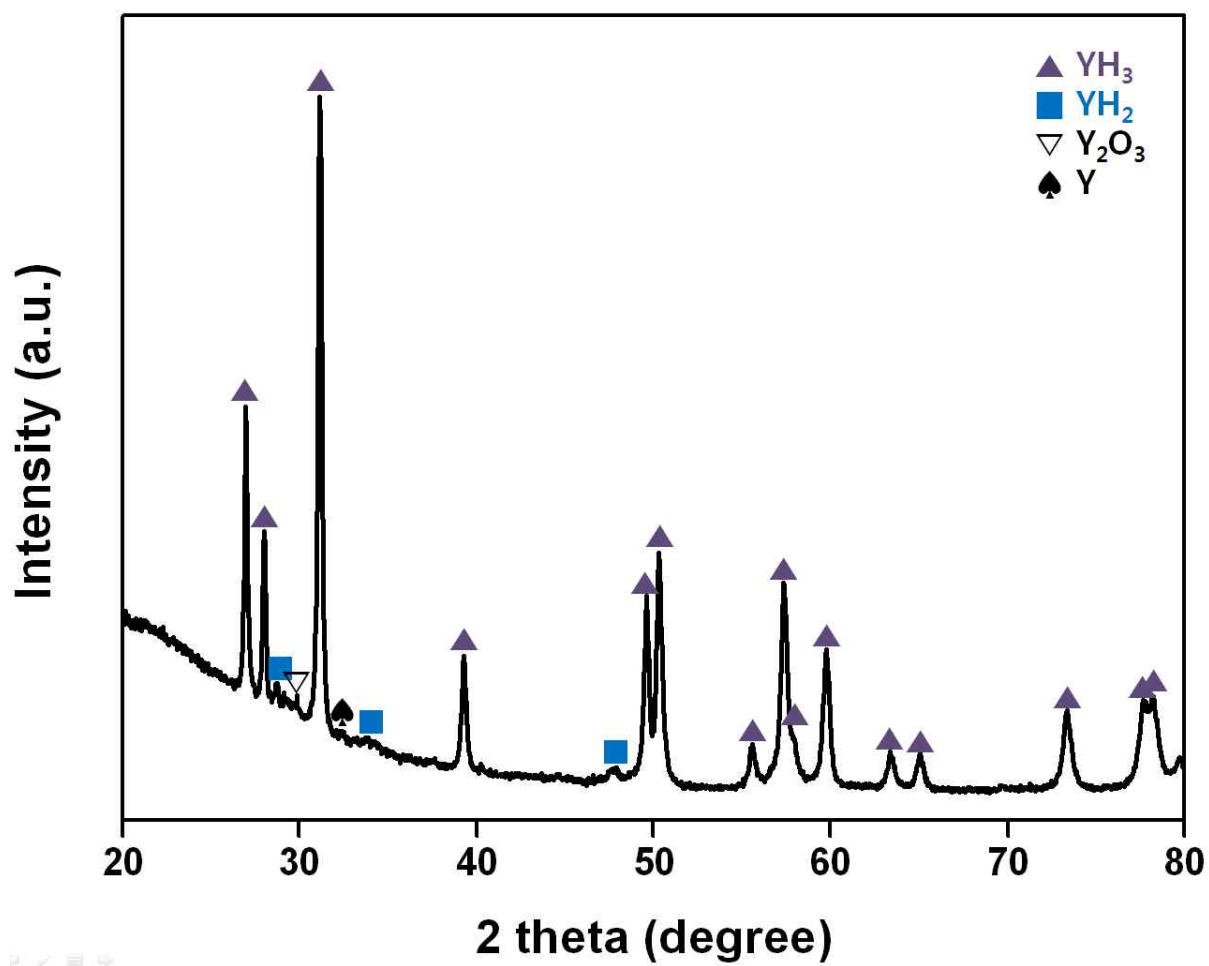

Fig. S1 XRD pattern of  $\text{YH}_3$  synthesized at 350 °C for 2 hours under 9 MPa of hydrogen.

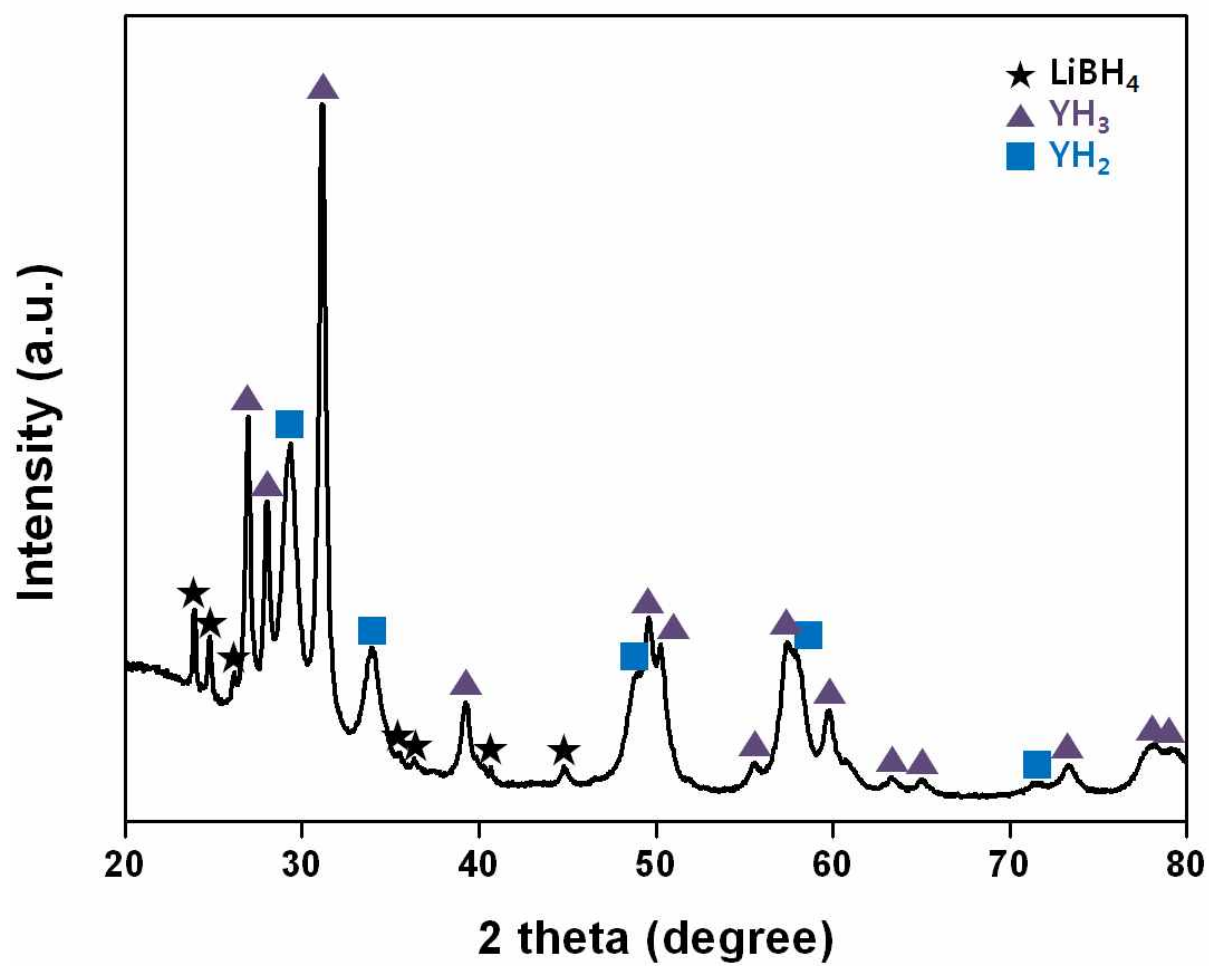

**Fig. S2** XRD pattern of  $4\text{LiBH}_4 + \text{YH}_3$  composite prepared by ball milling.

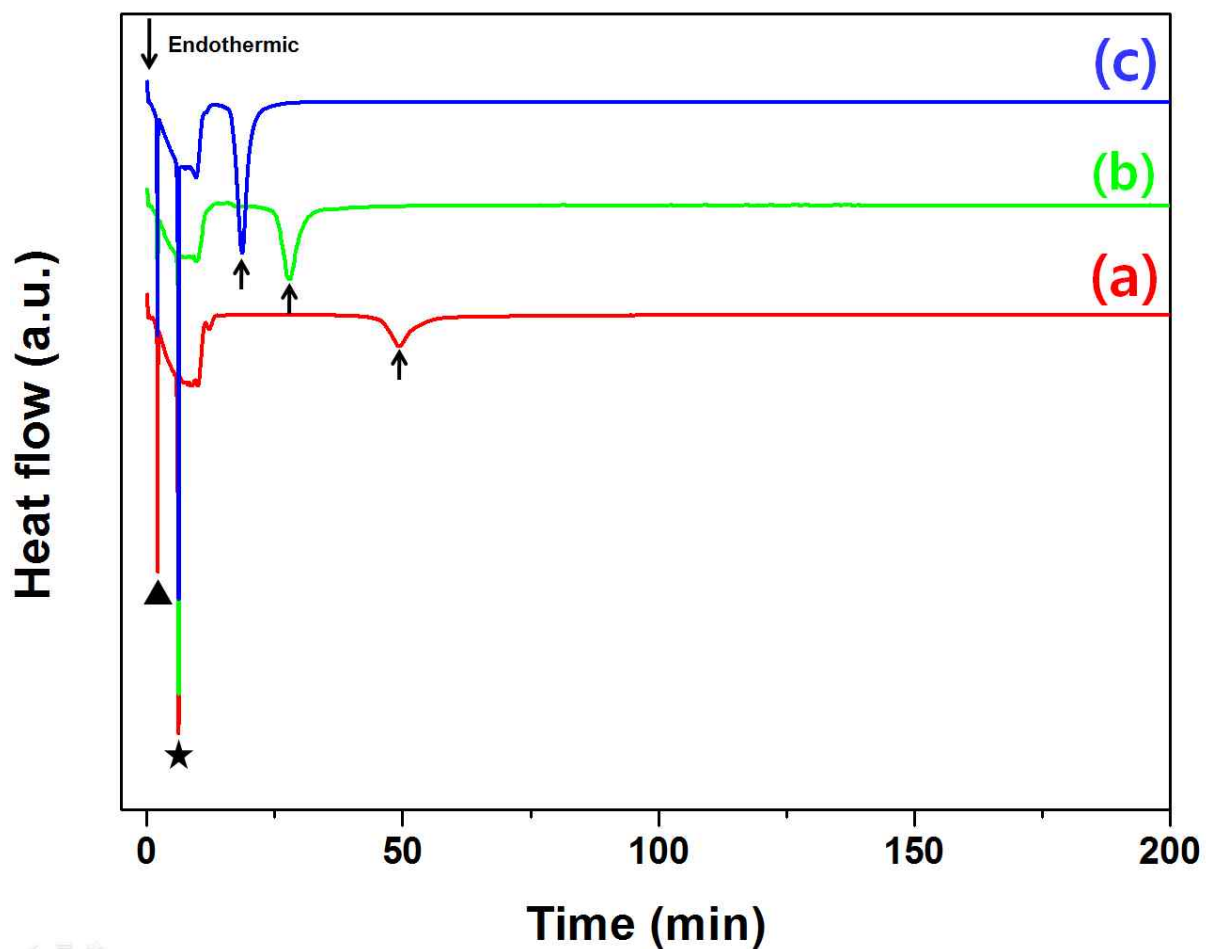

**Fig. S3** HP-DSC curves of  $4\text{LiBH}_4 + \text{YH}_3$  composite dehydrogenated under (a) 0.3, (b) 0.4 and (c) 0.5 MPa of hydrogen. The crucible was heated to  $400\text{ }^\circ\text{C}$  with a rate of  $40\text{ }^\circ\text{C}/\text{min}$  and then maintained at  $400\text{ }^\circ\text{C}$  for 200 minutes. The symbol triangle, star and arrows indicate the phase transformation of  $\text{LiBH}_4$  (orthorhombic to hexagonal), melting of  $\text{LiBH}_4$  and the dehydrogenation of  $\text{LiBH}_4 + \text{YH}_3$  composite, respectively.

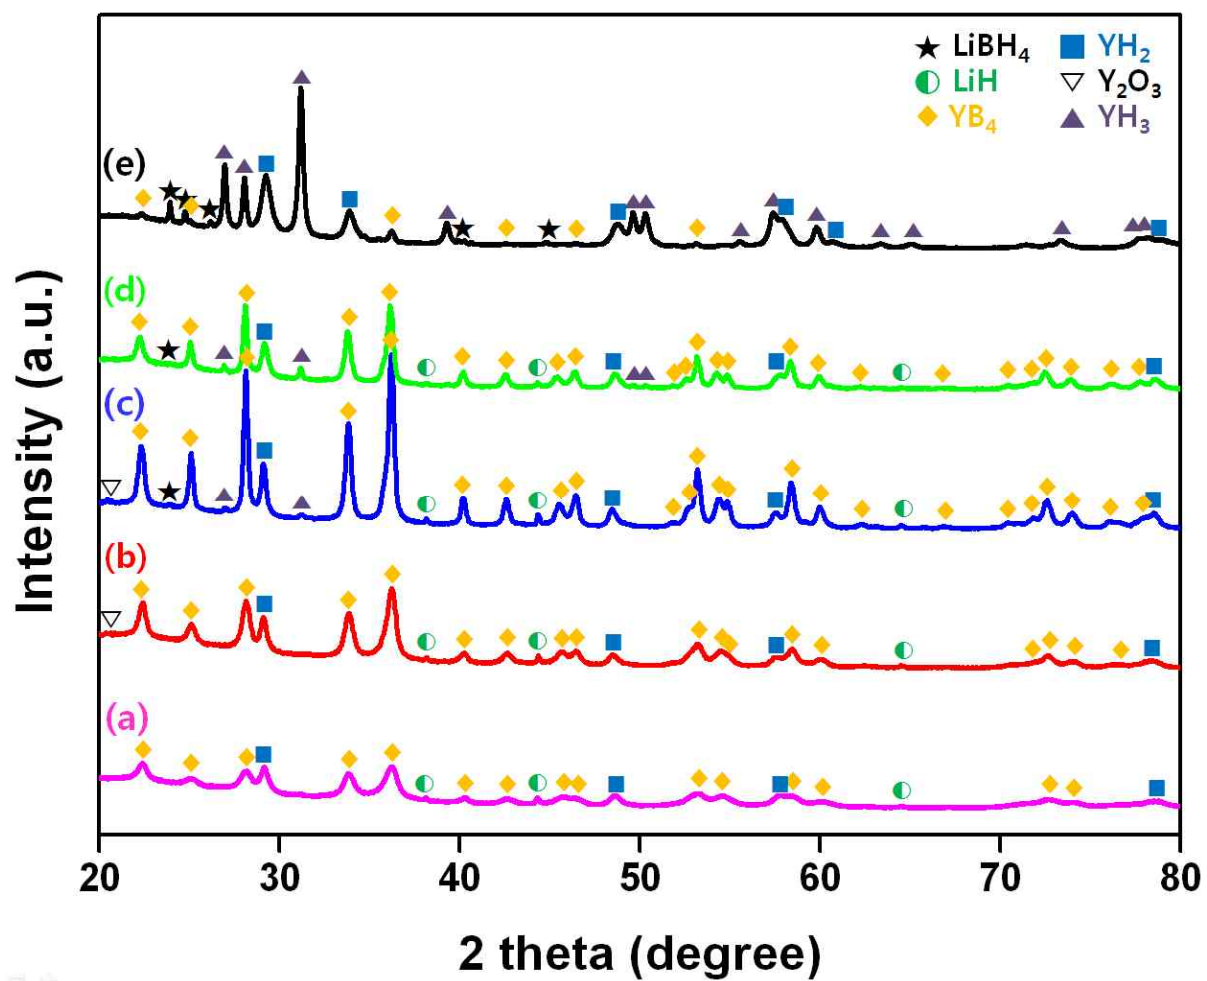

Fig. S4 XRD patterns of  $4\text{LiBH}_4 + \text{YH}_3$  composite dehydrogenated under (a) 0.1, (b) 0.2, (c) 0.5, (d) 0.7 and (e) 1.0 MPa of hydrogen.

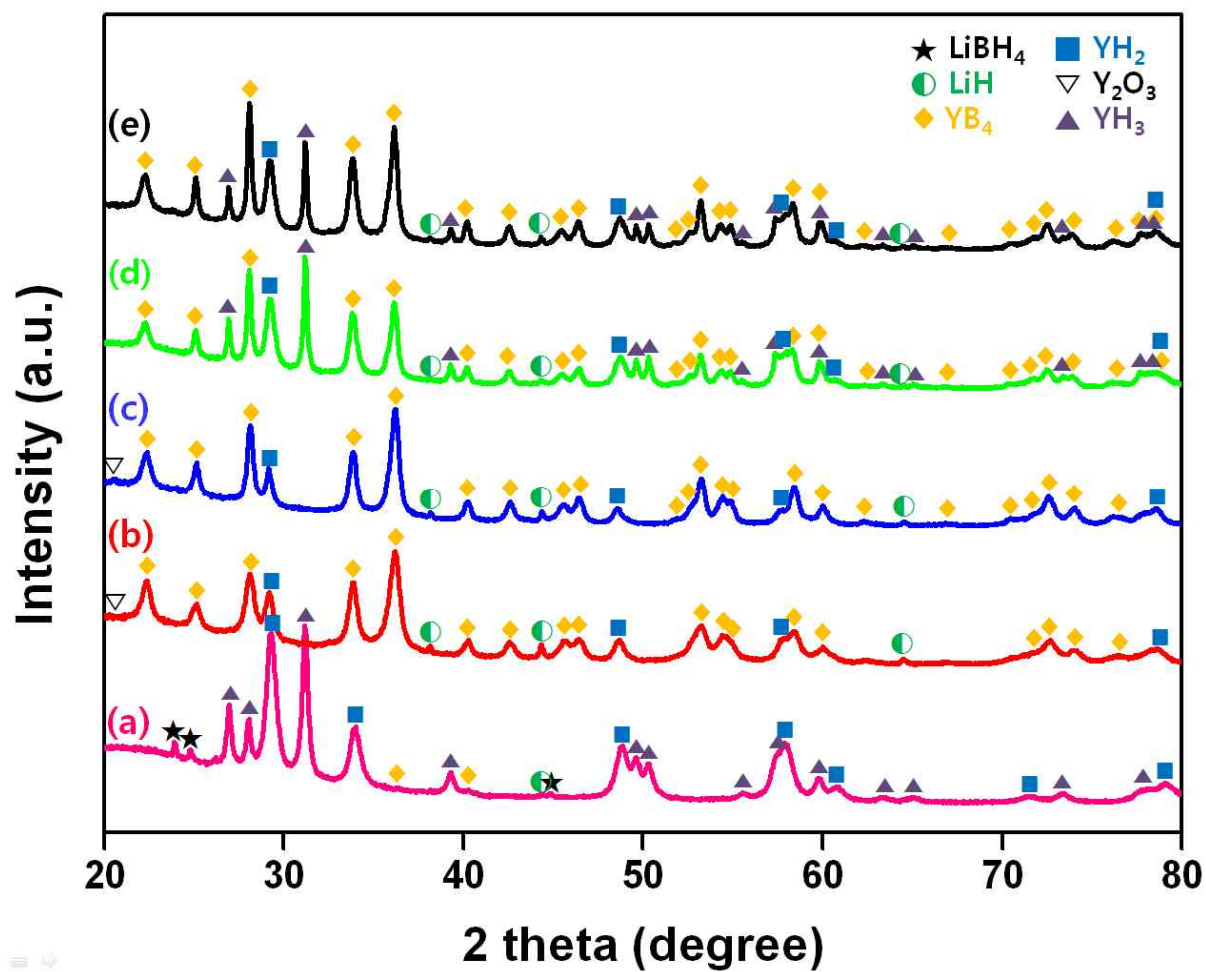

Fig. S5 XRD patterns of  $4\text{LiBH}_4 + \text{YH}_3$  composite dehydrogenated under (a) 0.1, (b) 0.2, (c) 0.5, (d) 0.7 and (e) 1.0 MPa of argon.

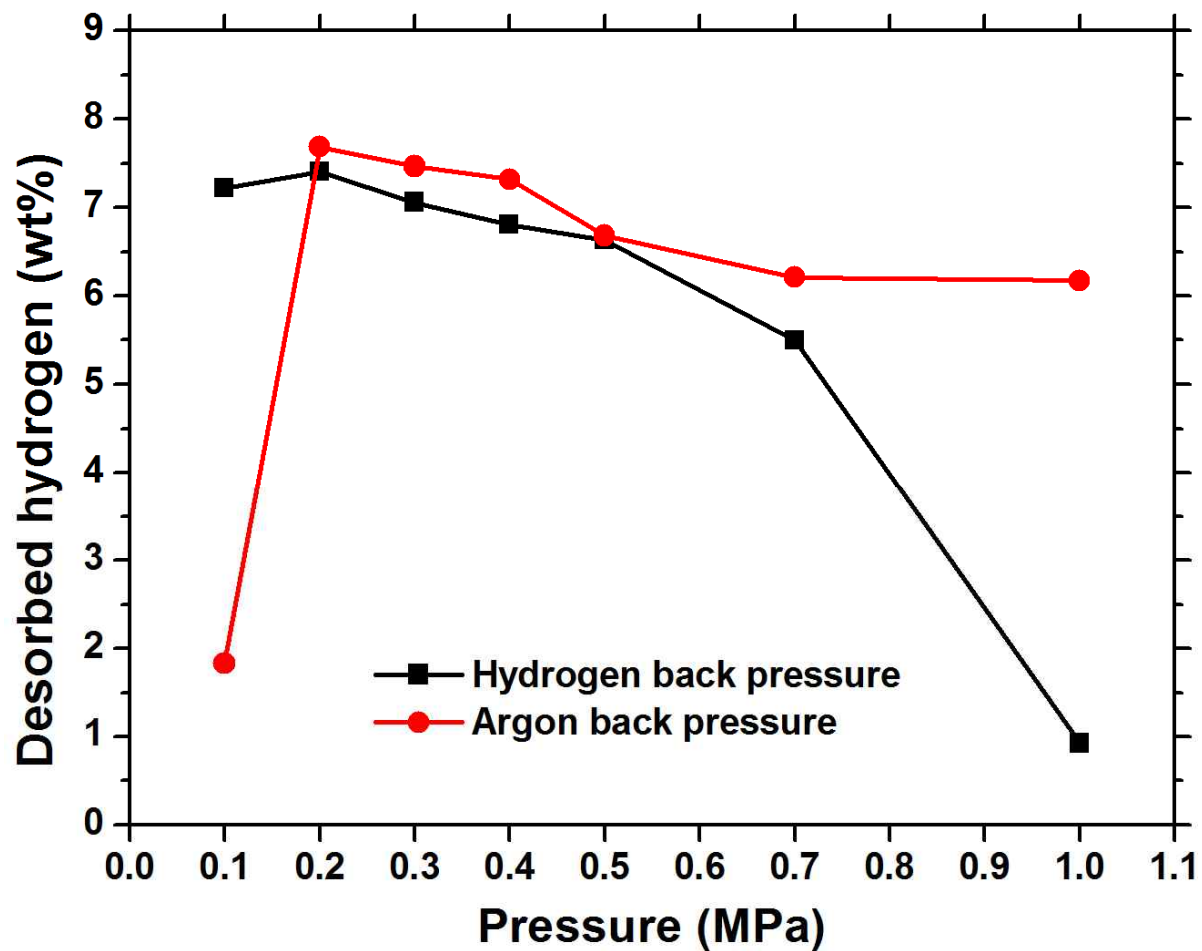

Fig. S6 The amount of desorbed hydrogen of  $4\text{LiBH}_4+\text{YH}_3$  composite under (a) hydrogen and (b) argon back pressures.
